# Supplementary figures and images for: Human induced pluripotent stem cell-derived cardiac tissue on a thin collagen membrane with natural microstructures
Source: Royal Society of Chemistry journal article supplement (doi:10.1039/c6bm00522e), 2016-01-01

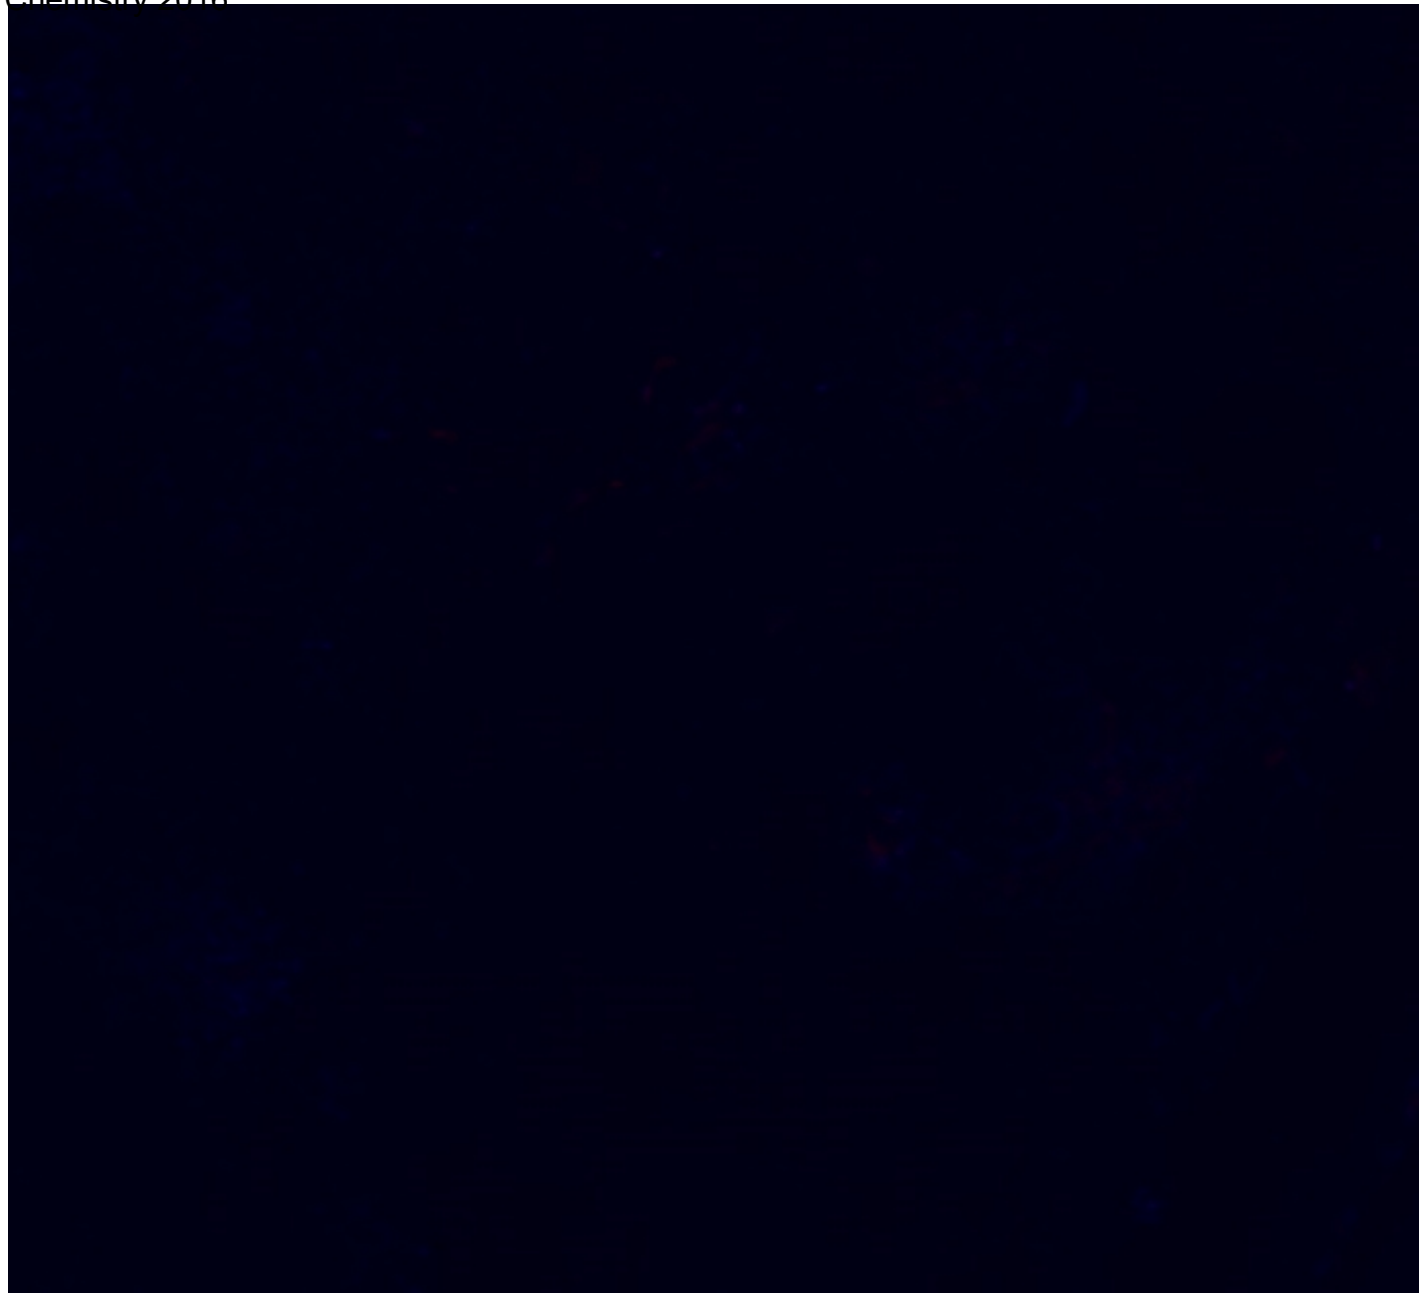

Supplement: c6bm00522e1.pdf [file c6bm00522e1.pdf]
